# Supplementary material for: The synthesis and application of an excitation-dependent ultra-long lifetime room temperature phosphorescence carbon dot composite
Source: Royal Society of Chemistry journal article supplement (doi:10.1039/d3nj01775c), 2023-01-01
Supplement: d3nj01775c1.pdf [file d3nj01775c1.pdf]

## Supplementary Information

### The Synthesis and Application of Excitation-Dependent Ultra-long Lifetime Room Temperature Phosphorescence Carbon Dots Composite

Zhaopeng Chen<sup>1</sup>, Xiumin Liang<sup>1, 2</sup>, Dan He<sup>2</sup>, Min Hu<sup>2, \*</sup> and Wen Luan<sup>3</sup>

<sup>1</sup> School of Science, Xi'an University of Technology, Xi'an 710054, Shanxi, China

<sup>2</sup> School of Chemistry, Xi'an Jiaotong University, Xi'an 710049, Shanxi, China

<sup>3</sup> Department of Biochemistry and Molecular Biology, Institute of Cellular and Developmental Biology, Hainan Provincial Key Laboratory for Human Reproductive Medicine and Genetic Research, Hainan Medical University, Haikou 571199, Hainan, China

\* E-mail: humin1971@mail.xjtu.edu.cn

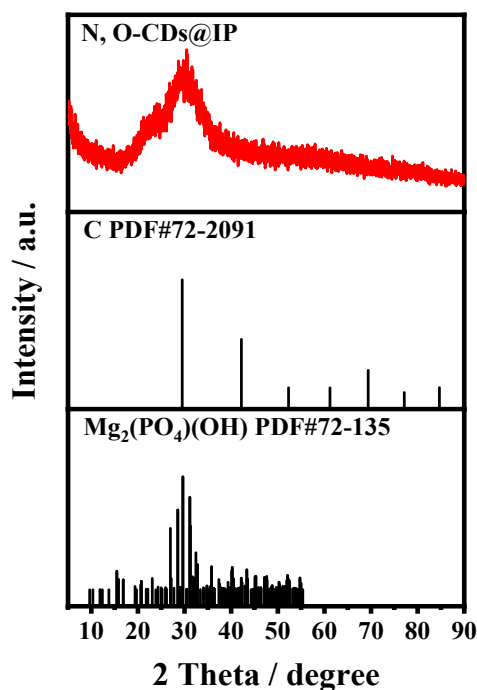

**Figure S1.** XRD patterns of CDs@Phosphate composite and the standard diffraction pattern of C (JCPDS Card No. 72-2091) and Mg<sub>2</sub>(PO<sub>4</sub>)(OH) (JCPDS Card No. 72-135).

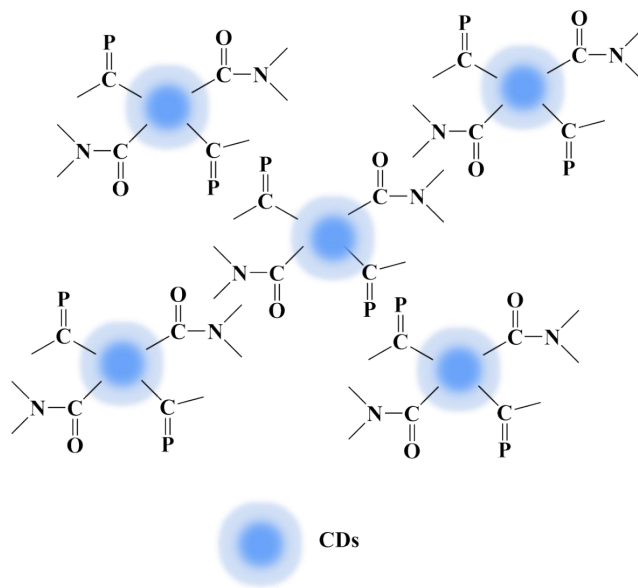

**Figure S2.** Schematic of the proposed structure of CDs@Phosphate composite.
